# Supplementary material for: Induction of Nickel Accumulation in Response to Zinc Deficiency in Arabidopsis thaliana
Source: PubMed Central journal article supplement (PMC4463596; doi:10.3390/ijms16059420), 2015-04-27
Supplement: ijms-16-09420-s001.pdf [file ijms-16-09420-s001.pdf]

## Supplementary Information

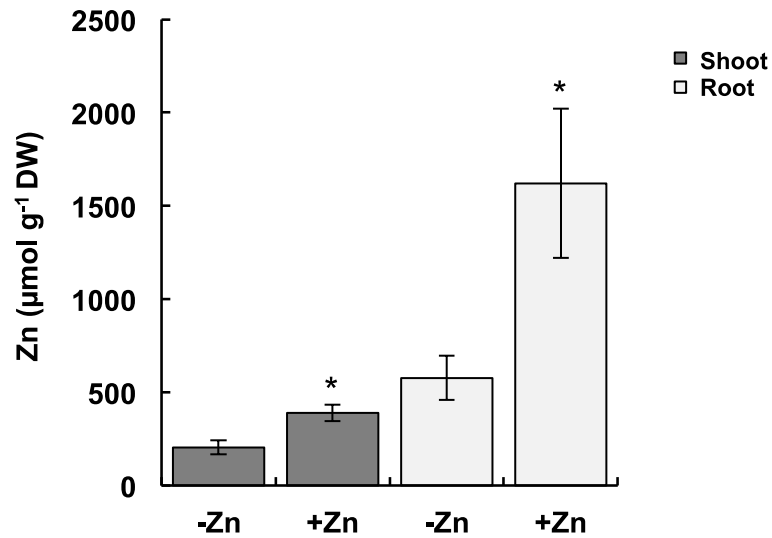

**Figure S1.** Ni accumulation in the plants of Col-0 grown on Zn-sufficient and -deficient plates.

One-week-old plants were grown on MGRL plates containing 0 or 5  $\mu\text{mol}\cdot\text{L}^{-1}$   $\text{ZnCl}_2$  for 1 week. Asterisks denote significant differences ( $p < 0.05$ , Wilcoxon-Mann-Whitney test) between the Zn-sufficient and -deficient conditions. The values represent means  $\pm$  SD based on four independent experiments.
